# Supplementary material for: Effects of Mycobacterium vaccae NCTC 11659 and Lipopolysaccharide Challenge on Polarization of Murine BV-2 Microglial Cells
Source: MDPI journal article supplement (doi:10.3390/ijms25010474), 2023-12-29
Supplement: s1 [file s1]

## Supplemental materials

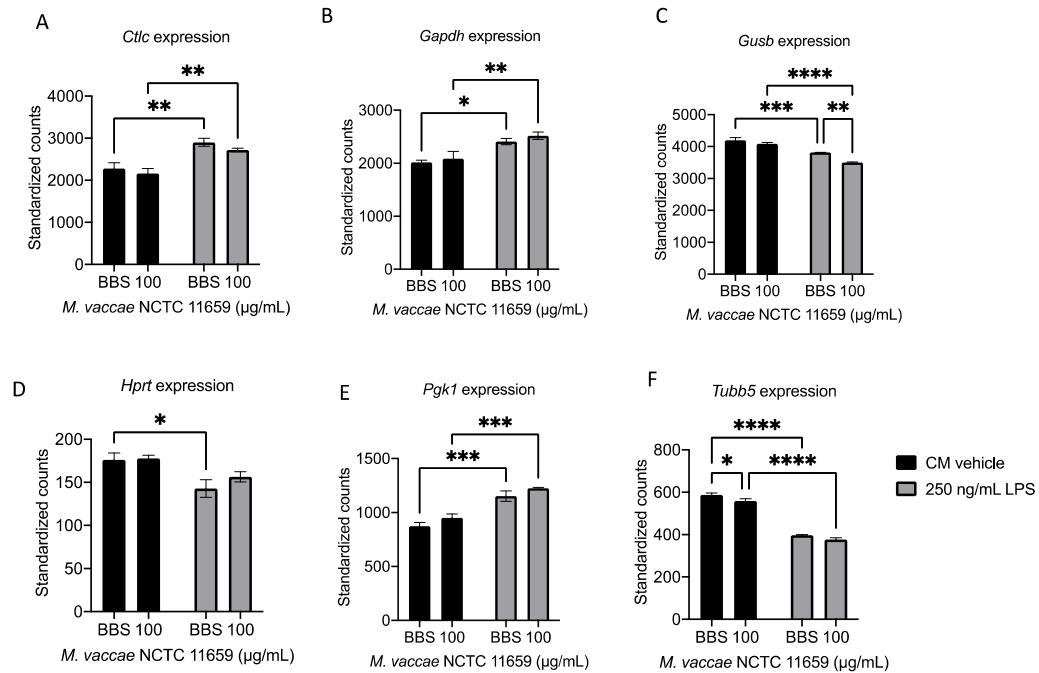

**Figure S1.** Treating murine BV-2 microglial cells with *M. vaccae* NCTC 11659 (100 µg/mL, 48 h) or sterile borate-buffered saline (BBS) vehicle control conditions and lipopolysaccharide (LPS; 250 ng/mL, 24 h) or a cell culture media (CM) vehicle control condition resulted in differential expression of all internal housekeeping genes in the nCounter Mouse Inflammation v2 Panel. Graphs illustrate effects of treatment on (A) *Ctltc* mRNA expression, (B) *Gapdh* mRNA expression, (C) *Gusb* mRNA expression, (D) *Hprt* mRNA expression, (E) *Pgk1* mRNA expression, and (F) *Tubb5* mRNA expression. Data were analyzed using a two-way ANOVA followed by Fisher's LSD test using a single pooled error value, if appropriate, at a two-tailed alpha level of 0.05. \* $p < 0.05$ , \*\* $p < 0.01$ , \*\*\* $p < 0.001$ , \*\*\*\* $p < 0.0001$ . For all experimental conditions, there were 3 technical replicates ( $n = 3$ ) from  $N = 1$  experiment. Abbreviations: BBS, borate-buffered saline; CM, culture media; *Ctltc*, gene encoding clathrin heavy chain; *Gapdh*, gene encoding glyceraldehyde 3-phosphate dehydrogenase; *Gusb*, gene encoding beta glucuronidase; *Hprt*, gene encoding hypoxanthine-guanine phosphoribosyltransferase; LPS, lipopolysaccharide; *Pgk1*, gene encoding phosphoglycerate kinase; *Tubb*, gene encoding tubulin beta chain.

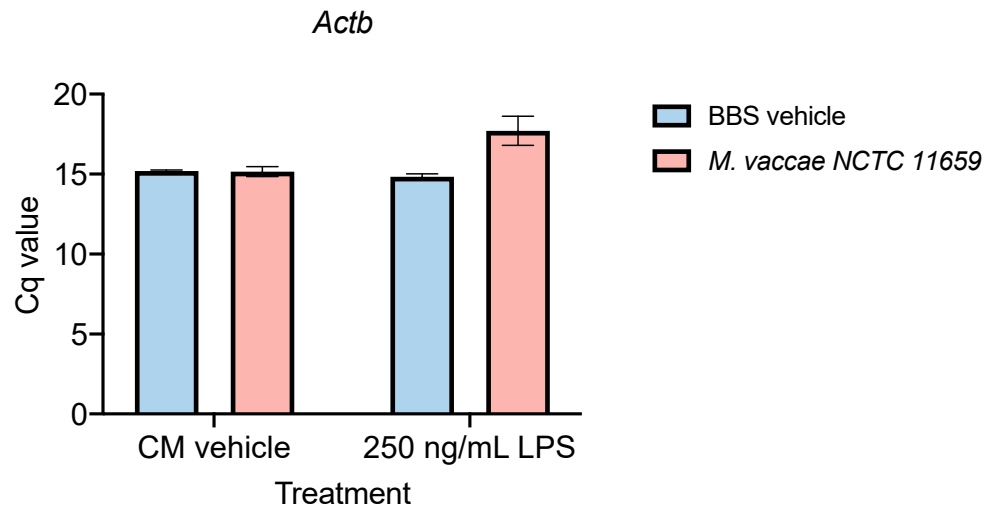

**Figure S2.** Effects of treatment of murine BV-2 microglial cells with *M. vaccae* NCTC 11659 (100  $\mu$ g/mL or sterile borate-buffered saline vehicle control condition; 48 h) and lipopolysaccharide (0, 250 ng/mL; 24 h) or a cell culture media (CM) vehicle control condition on the expression of *Actb*. Abbreviations: BBS, borate-buffered saline. LPS, lipopolysaccharide.

*M. vaccae* NCTC 11659/CMV vs. BBS/CMV

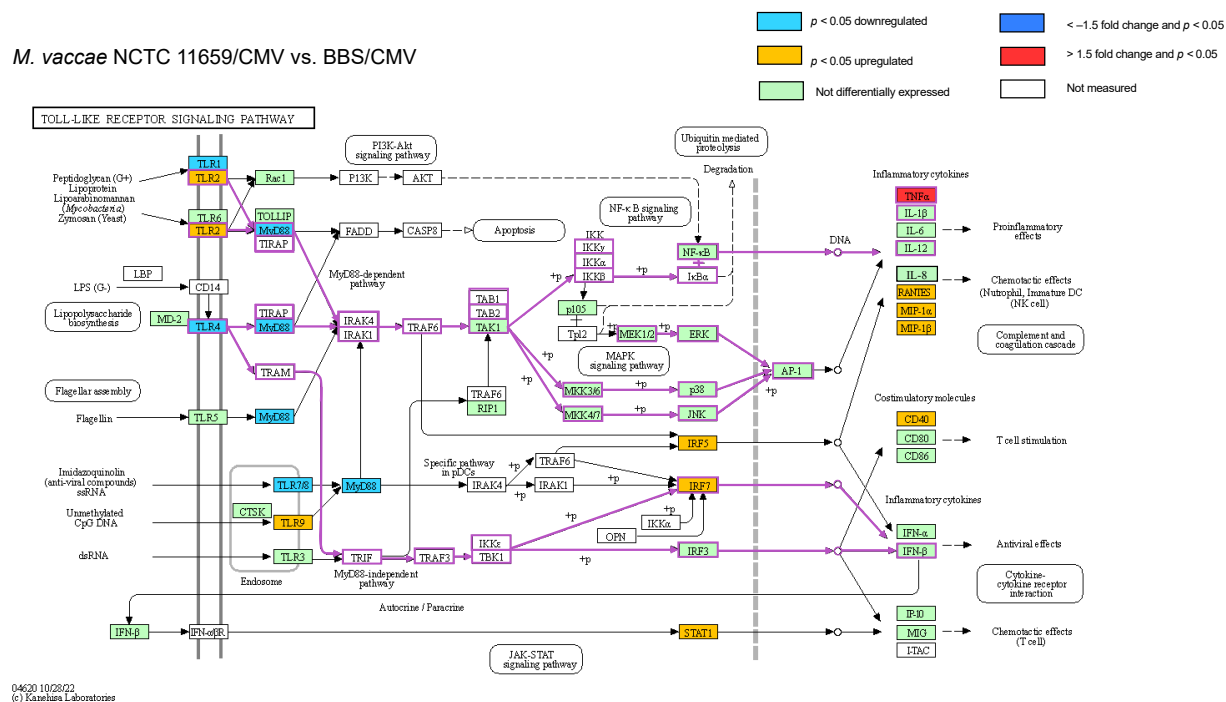

**Figure S3.** Toll-like receptor signaling KEGG pathway color-coded to reflect the effects of 100  $\mu\text{g/mL}$  *M. vaccae* NCTC 11659 on gene expression. Genes highlighted in blue were downregulated by 100  $\mu\text{g/mL}$  *M. vaccae* NCTC 11659, genes highlighted in red were upregulated by 100  $\mu\text{g/mL}$  *M. vaccae* NCTC 11659, genes highlighted in green were not differentially expressed, and genes in white were not measured. Genes highlighted in light blue had a significant decrease in expression ( $p < 0.05$ ) following treatment with 100  $\mu\text{g/mL}$  *M. vaccae* NCTC 11659 but did not have a 1.5-fold change. Genes highlighted in orange had a significant increase in expression ( $p < 0.05$ ) following treatment with 100  $\mu\text{g/mL}$  *M. vaccae* NCTC 11659 but did not have a 1.5-fold change. The purple line indicates TLR2 and TLR4 signaling pathways.

# BBS/LPS vs. BBS/CMV

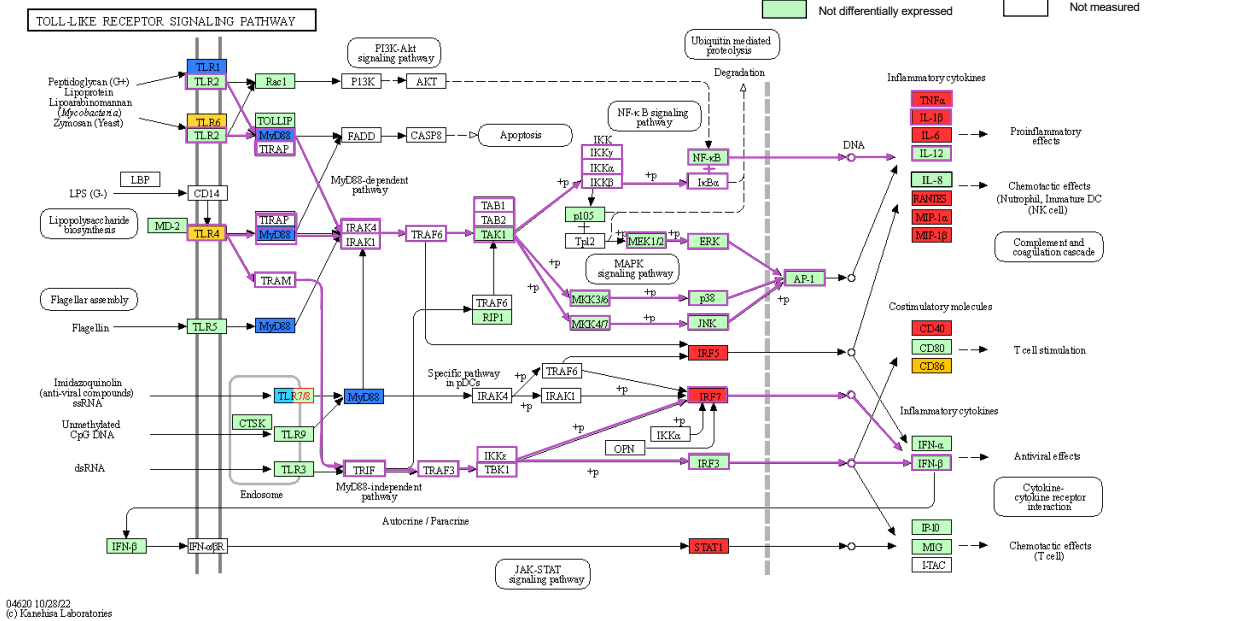

**Figure S4.** Toll-like receptor signaling KEGG pathway color-coded to reflect the effects of 250 ng/mL lipopolysaccharide (LPS) on gene expression. Genes highlighted in blue were downregulated by 250 ng/mL LPS and had at least a 1.5-fold change, genes highlighted in red were upregulated by 250 ng/mL LPS with at least a 1.5-fold change, genes highlighted in green were not differentially expressed, and genes in white were not measured. Genes highlighted in light blue had a significant decrease in expression ( $p < 0.05$ ) following treatment with 250 ng/mL LPS treatment ( $p < 0.05$ ) but did not have a 1.5-fold change. Genes highlighted in orange had a significant increase in expression ( $p < 0.05$ ) following treatment with 250 ng/mL LPS treatment ( $p < 0.05$ ) but did not have a 1.5-fold change. The purple line indicates TLR2 and TLR4 signaling pathways.

*M. vaccae* NCTC 11659/LPS vs. BBS/LPS

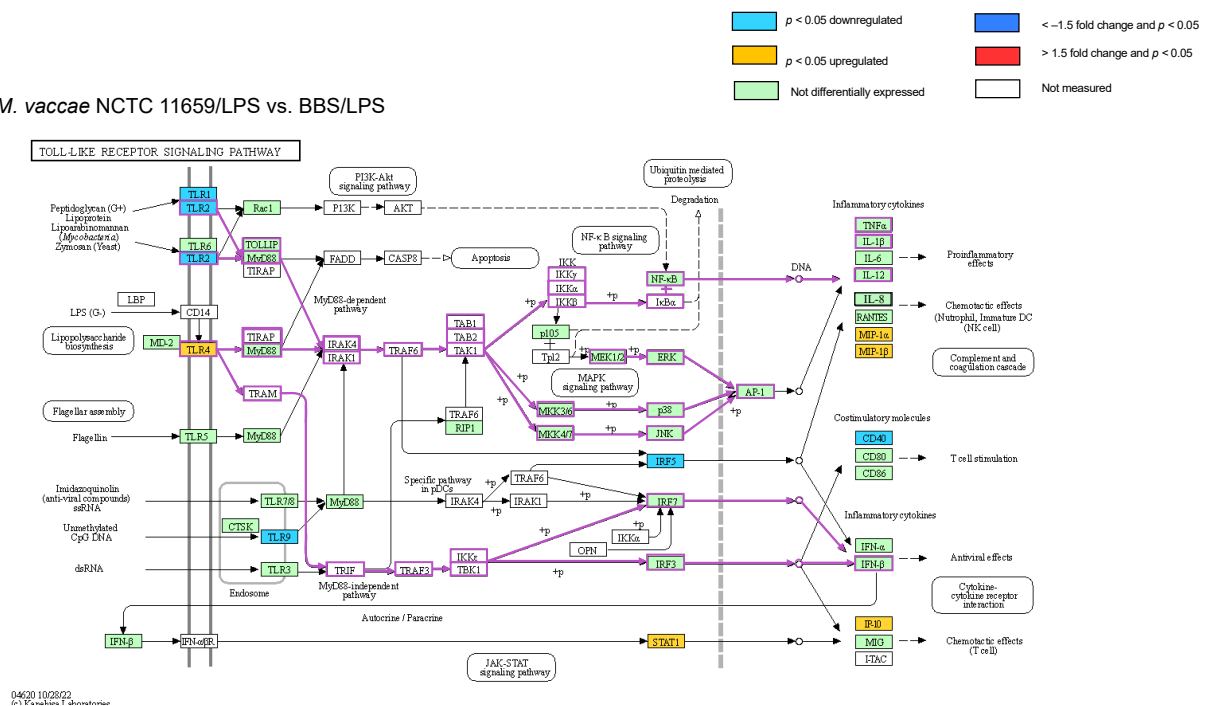

**Figure S5.** Toll-like receptor signaling KEGG pathway color-coded to reflect the effects of 100 µg/mL *M. vaccae* NCTC 11659 in the presence of 250 ng/mL lipopolysaccharide (LPS) on gene expression. Genes highlighted in blue were downregulated by 100 µg/mL *M. vaccae* NCTC 11659, genes highlighted in red were upregulated by 100 µg/mL *M. vaccae* NCTC 11659, genes highlighted in green were not differentially expressed, and genes in white were not measured. Genes highlighted in light-blue cells had a significant decrease in expression ( $p < 0.05$ ) following treatment with 100 µg/mL *M. vaccae* NCTC 11659 ( $p < 0.05$ ) but did not have a 1.5-fold change. Genes highlighted in orange had a significant increase in expression ( $p < 0.05$ ) following treatment with 100 µg/mL *M. vaccae* NCTC 11659 ( $p < 0.05$ ) but did not have a 1.5-fold change. The purple line indicates TLR2 and TLR4 signaling pathways.

*M. vaccae* NCTC 11659/LPS vs. *M. vaccae* NCTC 11659/CMV

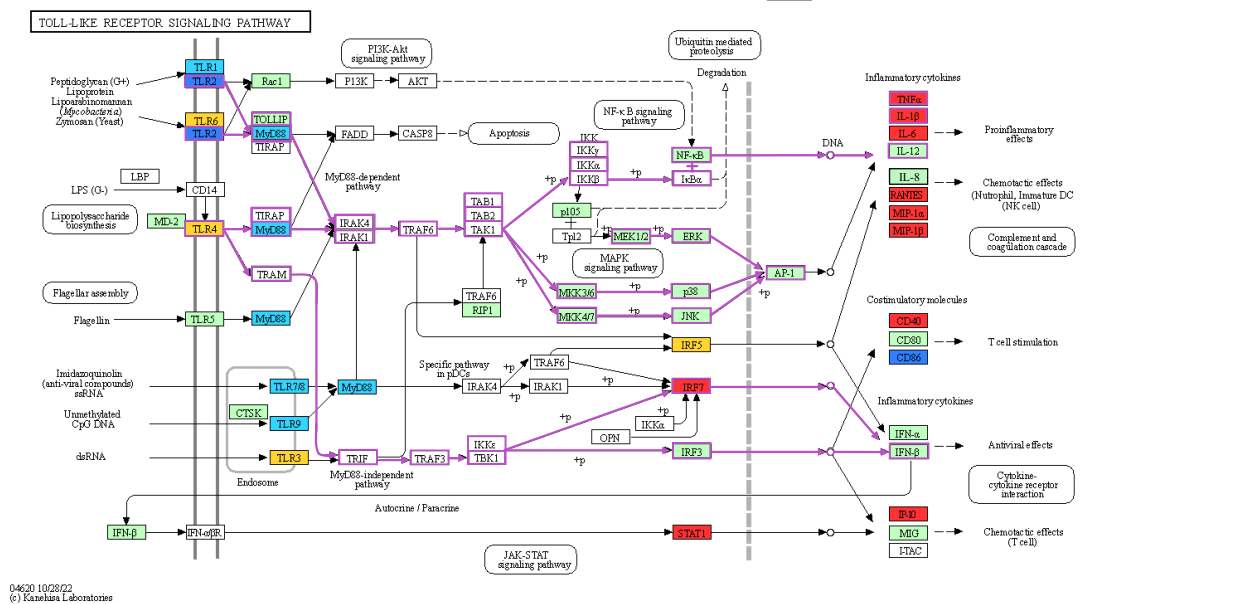

**Figure S6.** Toll-like receptor signaling KEGG pathway color-coded to reflect the effects of 250 ng/mL lipopolysaccharide (LPS) in the presence of 100  $\mu$ g/mL *M. vaccae* NCTC 11659 on gene expression. Genes highlighted in blue were downregulated by 250 ng/mL LPS, genes highlighted in red were upregulated by 250 ng/mL LPS, genes highlighted in green were not differentially expressed, and genes in white were not measured. Genes highlighted in light blue had a significant decrease in expression ( $p < 0.05$ ) following treatment with 250 ng/mL LPS treatment ( $p < 0.05$ ) but did not have a 1.5-fold change. Genes highlighted in orange had a significant increase in expression ( $p < 0.05$ ) following treatment with 250 ng/mL LPS treatment ( $p < 0.05$ ) but did not have a 1.5-fold change. The purple line indicates TLR2 and TLR4 signaling pathways.

## Supplemental tables

**Table S1.** Log2 fold changes among differentially expressed genes in the *M. vaccae* NCTC 11659/CMV versus BBS/CMV comparison.

| Gene symbols  | Log2 Fold Change |
|---------------|------------------|
| Upregulated   |                  |
| <i>C3</i>     | 1.16881          |
| <i>Ccl2</i>   | 0.698848         |
| <i>Tnf</i>    | 0.677453         |
| Downregulated |                  |
| <i>Arg1</i>   | -1.64186         |
| <i>Smad7</i>  | -0.62623         |

**Table S2.** Genes that had *p*-values less than 0.05 in the *M. vaccae* NCTC 11659/CMV versus BBS/CMV comparison.

| Gene Symbol     | Log2 Fold Change |
|-----------------|------------------|
| Upregulated     |                  |
| <i>C1ra</i>     | 0.522863333      |
| <i>Map2k6</i>   | 0.503656667      |
| <i>Relb</i>     | 0.495151333      |
| <i>Tlr2</i>     | 0.474013333      |
| <i>Il1a</i>     | 0.45724          |
| <i>Tradd</i>    | 0.441106667      |
| <i>Maff</i>     | 0.42836          |
| <i>Ccl5</i>     | 0.41674          |
| <i>Tnfaip3</i>  | 0.413766667      |
| <i>Cd40</i>     | 0.33927          |
| <i>Irf1</i>     | 0.318105         |
| <i>Ccl3</i>     | 0.304396667      |
| <i>Rock2</i>    | 0.256366667      |
| <i>Ccl4</i>     | 0.251118         |
| <i>Nfkb1</i>    | 0.240120333      |
| <i>Rapgef2</i>  | 0.234643333      |
| <i>Stat3</i>    | 0.229596667      |
| <i>Mapkapk2</i> | 0.221023333      |
| <i>Irf7</i>     | 0.20075          |
| <i>Il18</i>     | 0.197            |
| <i>Cxcr1</i>    | 0.194853333      |
| <i>Cfb</i>      | 0.190016667      |
| <i>Nfe2l2</i>   | 0.166356667      |

|                |              |
|----------------|--------------|
| <i>Tlr9</i>    | 0.16627      |
| <i>Stat1</i>   | 0.152266667  |
| <i>Ifit2</i>   | 0.150683333  |
| <i>Itgb2</i>   | 0.12703      |
| <i>Cebpb</i>   | 0.118883333  |
| <i>Nod2</i>    | 0.107374333  |
| <i>Grb2</i>    | 0.10702      |
| <i>Cxcl2</i>   | 0.096584     |
| <i>Shc1</i>    | 0.09582      |
| <i>Mafg</i>    | 0.093901333  |
| <i>Bcl2l1</i>  | 0.092198     |
| <i>Mapk1</i>   | 0.09019      |
| <i>Mapk8</i>   | 0.086444     |
| <i>Hdac4</i>   | 0.080853333  |
| <i>Mrc1</i>    | 0.08044      |
| <i>Mx2</i>     | 0.067417667  |
| <i>Mx1</i>     | 0.066616667  |
| <i>Irf5</i>    | 0.06568      |
| <i>Oasl1</i>   | 0.05803      |
| <i>Gnaq</i>    | 0.046157     |
| <i>Tollip</i>  | 0.043597333  |
| <i>Ptgir</i>   | 0.041338     |
| <i>Tgfb1</i>   | 0.040803333  |
| <i>Hif1a</i>   | 0.03787      |
| Downregulated  |              |
| <i>Il15</i>    | -0.48629     |
| <i>Oas2</i>    | -0.466773333 |
| <i>Fxyd2</i>   | -0.465263333 |
| <i>Ripk1</i>   | -0.407486667 |
| <i>Tlr1</i>    | -0.370292723 |
| <i>Cysltr1</i> | -0.36564     |
| <i>Mef2d</i>   | -0.357553    |
| <i>Limk1</i>   | -0.339843333 |
| <i>Cxcr4</i>   | -0.321923333 |
| <i>Map3k5</i>  | -0.318477    |
| <i>Myd88</i>   | -0.292906667 |
| <i>Mafk</i>    | -0.292616667 |
| <i>Prkcb</i>   | -0.292127333 |
| <i>Mknk1</i>   | -0.272153333 |



|                 |              |
|-----------------|--------------|
| <i>Ptk2</i>     | -0.265663333 |
| <i>Il1rap</i>   | -0.255903333 |
| <i>Max</i>      | -0.243566667 |
| <i>Ddit3</i>    | -0.225653333 |
| <i>Hmgb1</i>    | -0.223086667 |
| <i>Ifi2712a</i> | -0.207843333 |
| <i>Stat2</i>    | -0.198543333 |
| <i>Ptgs1</i>    | -0.190846667 |
| <i>Trem2</i>    | -0.18747     |
| <i>Tlr8</i>     | -0.177774667 |
| <i>Traf2</i>    | -0.166396667 |
| <i>Cxcl10</i>   | -0.15852     |
| <i>Tlr4</i>     | -0.156593333 |
| <i>C3ar1</i>    | -0.15266     |
| <i>Cfl1</i>     | -0.150703333 |
| <i>Map2k4</i>   | -0.144073333 |
| <i>Hmgn1</i>    | -0.140913333 |
| <i>Tgfbr1</i>   | -0.135936667 |
| <i>Rela</i>     | -0.131246667 |
| <i>Jun</i>      | -0.12641     |
| <i>Rhoa</i>     | -0.11677     |
| <i>Nr3c1</i>    | -0.115952667 |
| <i>Tcf4</i>     | -0.115070333 |
| <i>Prkca</i>    | -0.114099    |
| <i>Pdgfa</i>    | -0.113133333 |
| <i>Fos</i>      | -0.109136667 |
| <i>Rac1</i>     | -0.10565     |
| <i>Tyrobp</i>   | -0.104916667 |
| <i>Keap1</i>    | -0.101661333 |
| <i>Gnas</i>     | -0.09738     |
| <i>Flt1</i>     | -0.094111    |
| <i>C4a</i>      | -0.086458333 |
| <i>Mef2c</i>    | -0.084173333 |
| <i>Gngt1</i>    | -0.071236667 |
| <i>Mapkapk5</i> | -0.06905     |
| <i>Nfatc3</i>   | -0.068228    |
| <i>Ppp1r12b</i> | -0.067863333 |
| <i>Raf1</i>     | -0.067411333 |
| <i>Map3k7</i>   | -0.065804    |

|                |              |
|----------------|--------------|
| <i>Gnb1</i>    | -0.063546667 |
| <i>Cdc42</i>   | -0.05227     |
| <i>Mmp9</i>    | -0.051743333 |
| <i>Nlrp3</i>   | -0.049161333 |
| <i>Ptgs2</i>   | -0.045203333 |
| <i>Pla2g4a</i> | -0.021403993 |
| <i>Mapk3</i>   | -0.02038     |
| <i>Ly96</i>    | -0.018520667 |

**Table S3. List of abbreviations for all gene symbols**

*Alox12*, arachidonate 12-lipoxygenase  
APC, antigen-presenting cell  
*Arg1*, arginase 1  
BBS, borate-buffered saline  
*Birc2*, baculoviral IAP repeat-containing 2  
*Clqb*, complement component 1, q subcomponent, beta polypeptide  
*Clra*, complement component 1, r subcomponent A  
*Cls1*, complement component 1, s subcomponent 1  
*C3*, complement component 3  
*Ccl2*, C-C motif chemokine ligand 2  
*Ccl3*, C-C motif chemokine ligand 3  
*Ccl4*, C-C motif chemokine ligand 4  
*Ccl5*, C-C motif chemokine ligand 5  
*Ccl7*, C-C motif chemokine ligand 7  
*Ccr3*, chemokine (C-C motif) receptor 3  
*Cd163*, Cd163 antigen  
*Cd4*, Cd4 antigen  
*Cd40*, Cd40 antigen  
*Cebpb*, CCAAT/enhancer binding protein, beta  
*Cfb*, complement factor B  
CMV, cell culture media vehicle  
CNS, central nervous system  
*Csf1*, colony-stimulating factor 1  
*Csf3*, colony-stimulating factor 3  
*Cxcl10*, C-X-C motif chemokine ligand 10  
*Cxcl2*, C-X-C motif chemokine ligand 2  
*Cxcr1*, chemokine (C-X-C motif) receptor 1  
*Cxcr4*, chemokine (C-X-C motif) receptor 4  
*Daxx*, fas death domain-associated protein  
*Ddit3*, DNA-damage inducible transcript 3  
*Fasl*, fas ligand; *Fos*, FBJ osteosarcoma oncogene  
*H2-eb1*, histocompatibility 2, class II antigen E beta  
*Hif1a*, hypoxia-inducible factor 1, alpha subunit  
*Hmgb1*, high mobility group box 1  
*Hmgn1*, high mobility group nucleosomal binding domain 1  
*Hspb1*, heat shock protein 1  
*Ifi2712A*, interferon, alpha-inducible protein 27 like 2A  
*Ifi44*, interferon-induced protein 44  
*Ifit1*, interferon-induced protein with tetratricopeptide repeats 1  
*Ifit2*, interferon-induced protein with tetratricopeptide repeats 2  
*Ifit3*, interferon-induced protein with tetratricopeptide repeats 3  
*Iigp1*, interferon-inducible GTPase 1  
IL, interleukin  
*Il12b*, interleukin 12b  
*Il18*, interleukin 18

*Il1a*, interleukin 1 alpha  
*Il1b*, interleukin 1 beta  
*Il1r1*, interleukin 1 receptor, type 1  
*Il1rn*, interleukin 1 receptor antagonist  
*Il23a*, interleukin 23, alpha subunit p19  
*Il6*, interleukin 6  
*Il6ra*, interleukin 6 receptor, alpha  
*Irf1*, interferon regulatory factor 1  
*Irf5*, interferon regulatory factor 5  
LPS, lipopolysaccharide  
*Lta*, lymphotoxin A  
*Ly96*, lymphocyte antigen 96  
*Maff*, v-maf musculoaponeurotic fibrosarcoma oncogene family, protein F  
*M. vaccae*, *Mycobacterium vaccae*  
*Mafg*, v-maf musculoaponeurotic fibrosarcoma oncogene family, protein G  
*Map2k1*, mitogen-activated protein kinase kinase 1  
*Mapkapk2*, MAP kinase-activated protein kinase 2  
*Mef2a*, myocyte enhancer factor 2a  
*Mef2c*, myocyte enhancer factor 2C  
*Mmp9*, matrix metalloproteinase 9  
*Mrc1*, mannose receptor, C type 1  
*Mx1*, MX dynamin-like GTPase 1  
*Mx2*, MX dynamin-like GTPase 2  
*Myc*, myelocytomatosis oncogene  
*Myd88*, myeloid differentiation primary response gene 88  
NCTC, National Collection of Type Cultures  
*Nfe2l2*, nuclear factor, erythroid derived 2, like 2  
*Nfkb1*, nuclear factor of kappa light polypeptide gene enhancer in B cells 1, p105  
*Nlrp3*, NLR family, pyrin domain containing 3  
*Nod1*, nucleotide-binding oligomerization domain containing 1  
*Nod2*, nucleotide-binding oligomerization domain containing 2  
*Nos2*, nitric oxide synthase 2, inducible  
*Nox1*, NADPH oxidase 1  
*Oas1a*, 2'-5' oligoadenylate synthetase 1a  
*Oas2*, 2'-5' oligoadenylate synthetase 2  
*Oasl1*, 2'-5' oligoadenylate synthetase-like 1  
PNN, perineuronal net  
*Ptgir*, prostaglandin I receptor (IP)  
*Ptgs1*, prostaglandin-endoperoxide synthase 1  
*Ptgs2*, prostaglandin-endoperoxide synthase 2  
*Rapgef2*, rap guanine nucleotide exchange factor (GEF) 2  
*Rela*, v-rel reticuloendotheliosis viral oncogene homolog A  
*Relb*, avian reticuloendotheliosis viral (v-rel) oncogene related B  
*Ripk2*, receptor (TNFRSF)-interacting serine-threonine kinase 2  
*Stat1*, signal transducer and activator of transcription 1  
*Stat2*, signal transducer and activator of transcription 2

*Stat3*, signal transducer and activator of transcription 3  
TGFβ, transforming growth factor beta  
TLR, toll-like receptor  
*Tlr1*, toll-like receptor 1  
*Tlr2*, toll-like receptor 2  
*Tlr3*, toll-like receptor 3  
*Tlr6*, toll-like receptor 6  
*Tlr8*, toll-like receptor 8  
*Tlr9*, toll-like receptor 9  
*Tnf*, tumor necrosis factor  
*Tnfaip3*, tumor necrosis factor, alpha-induced protein 3  
*Traf2*, Tnf receptor-associated factor 2  
Treg, regulatory T cell  
*Trem2*, triggering receptor expressed on myeloid cells

**Table S4.** Log2 fold changes among differentially expressed genes in the BBS/250 ng/mL LPS versus BBS/CMV comparison.

| Gene Symbol    | Log2 Fold Change |
|----------------|------------------|
| Upregulated    |                  |
| <i>Cfb</i>     | 5.60648          |
| <i>Ccl5</i>    | 5.56549          |
| <i>Ifit1</i>   | 4.024            |
| <i>Cd40</i>    | 3.07338          |
| <i>Ifit3</i>   | 2.99376          |
| <i>Il1b</i>    | 2.79327          |
| <i>Il6</i>     | 2.61309          |
| <i>Nos2</i>    | 2.57817          |
| <i>Maff</i>    | 2.55533          |
| <i>Tnf</i>     | 2.4393           |
| <i>Tradd</i>   | 2.29754          |
| <i>C3</i>      | 2.26905          |
| <i>Ccl2</i>    | 2.0218           |
| <i>Irf1</i>    | 1.98211          |
| <i>Irf7</i>    | 1.92943          |
| <i>Ccl3</i>    | 1.85339          |
| <i>Rock2</i>   | 1.57019          |
| <i>Cxcr1</i>   | 1.56136          |
| <i>Oasl1</i>   | 1.54032          |
| <i>Il1a</i>    | 1.44444          |
| <i>Ccl4</i>    | 1.37771          |
| <i>Map2k6</i>  | 1.35468          |
| <i>Mx1</i>     | 1.27039          |
| <i>Cxcl2</i>   | 1.23382          |
| <i>Ifit2</i>   | 1.13021          |
| <i>Tnfaip3</i> | 0.975547         |
| <i>Clra</i>    | 0.929432         |
| <i>Il18</i>    | 0.830453         |
| <i>Il6ra</i>   | 0.79481          |
| <i>Ifi44</i>   | 0.756457         |
| <i>Csfl</i>    | 0.719692         |
| <i>Irf5</i>    | 0.713634         |
| <i>Stat1</i>   | 0.70563          |
| <i>Mx2</i>     | 0.702039         |
| <i>Keap1</i>   | 0.671778         |

|                |           |
|----------------|-----------|
| <i>Ripk2</i>   | 0.666244  |
| Downregulated  |           |
| <i>Arg1</i>    | -2.80374  |
| <i>Smad7</i>   | -1.93381  |
| <i>Limk1</i>   | -1.83436  |
| <i>Fxyd2</i>   | -1.79421  |
| <i>Ptgs1</i>   | -1.61283  |
| <i>Hmgn1</i>   | -1.53119  |
| <i>Trem2</i>   | -1.52992  |
| <i>Max</i>     | -1.5075   |
| <i>Myl2</i>    | -1.47985  |
| <i>Tlr8</i>    | -1.43853  |
| <i>Ripk1</i>   | -1.26378  |
| <i>Mef2d</i>   | -1.25684  |
| <i>Cysltr1</i> | -1.25576  |
| <i>Hmgb1</i>   | -1.22569  |
| <i>Clqb</i>    | -1.15706  |
| <i>Cxcr4</i>   | -1.12752  |
| <i>Ptger4</i>  | -1.11958  |
| <i>Maik</i>    | -0.999982 |
| <i>Ptk2</i>    | -0.996795 |
| <i>Mmp9</i>    | -0.985976 |
| <i>Mknk1</i>   | -0.943527 |
| <i>C1s1</i>    | -0.855773 |
| <i>Oas2</i>    | -0.85333  |
| <i>Cd86</i>    | -0.834836 |
| <i>Raf1</i>    | -0.834556 |
| <i>Map3k7</i>  | -0.819428 |
| <i>Pdgfa</i>   | -0.805386 |
| <i>Mrc1</i>    | -0.697027 |
| <i>Il1rap</i>  | -0.651947 |
| <i>Jun</i>     | -0.649737 |
| <i>Tlr1</i>    | -0.620468 |
| <i>Rhoa</i>    | -0.615622 |
| <i>Flt1</i>    | -0.610663 |
| <i>Cfl1</i>    | -0.602626 |
| <i>Myd88</i>   | -0.593948 |

**Table S5.** Genes that had *p*-values less than 0.05 in the BBS/LPS versus BBS/CMV comparison.

| Gene Symbol     | Log2 Fold Change |
|-----------------|------------------|
| Upregulated     |                  |
| <i>Atf2</i>     | 0.574514667      |
| <i>Cd4</i>      | 0.548781333      |
| <i>Gnas</i>     | 0.532883333      |
| <i>Grb2</i>     | 0.530340667      |
| <i>Rac1</i>     | 0.500567         |
| <i>Il10rb</i>   | 0.494686667      |
| <i>Bcl6</i>     | 0.492426667      |
| <i>H2-Eb1</i>   | 0.476682667      |
| <i>Tcf4</i>     | 0.427876667      |
| <i>Tyrobp</i>   | 0.426743333      |
| <i>Mafg</i>     | 0.41568          |
| <i>Mapk14</i>   | 0.401537333      |
| <i>Map2k4</i>   | 0.372703333      |
| <i>Map3k1</i>   | 0.36534          |
| <i>Pla2g4a</i>  | 0.360026333      |
| <i>Ppp1r12b</i> | 0.35498          |
| <i>Cdc42</i>    | 0.338123333      |
| <i>Tlr7</i>     | 0.331499333      |
| <i>Birc2</i>    | 0.321431667      |
| <i>Gnaq</i>     | 0.304983333      |
| <i>Gngt1</i>    | 0.302697667      |
| <i>Mapkapk5</i> | 0.261233         |
| <i>Mapk1</i>    | 0.236921         |
| <i>Gnb1</i>     | 0.234823333      |
| <i>Tollip</i>   | 0.224343333      |
| <i>C3ar1</i>    | 0.211985333      |
| <i>Nr3c1</i>    | 0.202471         |
| <i>Shc1</i>     | 0.189009         |
| <i>Ly96</i>     | 0.187679         |
| <i>Mapk3</i>    | 0.158596667      |
| <i>Tlr4</i>     | 0.145233333      |
| <i>Tgfb1</i>    | 0.12621          |
| <i>Rela</i>     | 0.100826667      |
| <i>Ifi2712a</i> | 0.081143333      |
| <i>Nfe2l2</i>   | 0.078463333      |



|                 |              |
|-----------------|--------------|
| <i>Stat2</i>    | 0.04284      |
| <i>Clqa</i>     | 0.024513333  |
| Downregulated   |              |
| <i>Ptgir</i>    | -0.528952333 |
| <i>Relb</i>     | -0.508803333 |
| <i>Elk1</i>     | -0.506823333 |
| <i>Map3k5</i>   | -0.48829     |
| <i>Nlrp3</i>    | -0.487453333 |
| <i>Ddit3</i>    | -0.473056667 |
| <i>Il1rn</i>    | -0.452563333 |
| <i>Map2k1</i>   | -0.436669667 |
| <i>Hdac4</i>    | -0.435948    |
| <i>Mapkapk2</i> | -0.427086667 |
| <i>Cebpb</i>    | -0.422433667 |
| <i>Ccl7</i>     | -0.414796667 |
| <i>Nox1</i>     | -0.35121     |
| <i>Ptgs2</i>    | -0.3473188   |
| <i>Stat3</i>    | -0.31330722  |
| <i>Tlr9</i>     | -0.285496667 |
| <i>Hif1a</i>    | -0.224553333 |
| <i>Bcl2l1</i>   | -0.21676     |
| <i>Oas1a</i>    | -0.206146667 |
| <i>Nod1</i>     | -0.204346    |
| <i>Hmgb2</i>    | -0.18363     |
| <i>Nod2</i>     | -0.181143333 |
| <i>Mapk8</i>    | -0.16611     |
| <i>Rapgef2</i>  | -0.164476667 |
| <i>Myc</i>      | -0.147813    |
| <i>Tlr6</i>     | -0.132133333 |
| <i>Il1r1</i>    | -0.129887333 |
| <i>Nfatc3</i>   | -0.124976667 |
| <i>Prkca</i>    | -0.062955667 |
| <i>Fos</i>      | -0.024766667 |

**Table S6.** Log2 fold changes among differentially expressed genes in the *M. vaccae* NCTC 11659/250 ng/mL LPS versus BBS/250 ng/mL LPS condition.

| Gene symbols   | Log2 Fold Change |
|----------------|------------------|
| Upregulated    |                  |
| <i>Ccl7</i>    | 1.10527          |
| <i>Csf3</i>    | 0.711066         |
| Downregulated  |                  |
| <i>Cysltr1</i> | -0.630051        |

**Table S7.** Genes that had *p*-values less than 0.05 in the *M. vaccae* NCTC 11659/250 ng/mL LPS versus BBS/250 ng/mL LPS comparison.

| Gene Symbol    | Log2 Fold Change |
|----------------|------------------|
| Upregulated    |                  |
| <i>Mmp9</i>    | 0.521552733      |
| <i>Tlr3</i>    | 0.46441          |
| <i>Ccl2</i>    | 0.454501667      |
| <i>Cxcr1</i>   | 0.432406667      |
| <i>Rps6ka5</i> | 0.385053333      |
| <i>Fos</i>     | 0.32347          |
| <i>Il15</i>    | 0.32142          |
| <i>Rock2</i>   | 0.321271         |
| <i>C1ra</i>    | 0.295016667      |
| <i>Hdac4</i>   | 0.293523333      |
| <i>Nos2</i>    | 0.289856667      |
| <i>Ripk2</i>   | 0.271563333      |
| <i>Ptgs2</i>   | 0.257453333      |
| <i>Mafg</i>    | 0.246756667      |
| <i>Mknk1</i>   | 0.23039          |
| <i>Tradd</i>   | 0.227473333      |
| <i>Il1rn</i>   | 0.223083333      |
| <i>Myc</i>     | 0.208986667      |
| <i>Cxcl2</i>   | 0.191143333      |
| <i>Mapk8</i>   | 0.191081         |
| <i>Fxyd2</i>   | 0.185787467      |
| <i>Jun</i>     | 0.185123333      |
| <i>Map2k4</i>  | 0.184196667      |
| <i>Ccl4</i>    | 0.168313333      |
| <i>Tcf4</i>    | 0.167267667      |
| <i>Cxcl10</i>  | 0.161426667      |
| <i>Flt1</i>    | 0.140163333      |

|                |              |
|----------------|--------------|
| <i>Mrc1</i>    | 0.1365       |
| <i>Ccl3</i>    | 0.13141      |
| <i>Keap1</i>   | 0.126113333  |
| <i>Stat1</i>   | 0.11608      |
| <i>Mapk3</i>   | 0.10595      |
| <i>Cfb</i>     | 0.098346667  |
| <i>Oasl1</i>   | 0.08909      |
| <i>Il1a</i>    | 0.083816667  |
| <i>Pla2g4a</i> | 0.080459333  |
| <i>Shc1</i>    | 0.076493333  |
| <i>Nlrp3</i>   | 0.065152433  |
| <i>Tlr4</i>    | 0.043196667  |
| Downregulated  |              |
| <i>Tlr9</i>    | -0.37297     |
| <i>Mx2</i>     | -0.2752792   |
| <i>Cd40</i>    | -0.252691667 |
| <i>Bcl6</i>    | -0.227363333 |
| <i>Tlr1</i>    | -0.225156667 |
| <i>Mx1</i>     | -0.219863333 |
| <i>Grb2</i>    | -0.206496667 |
| <i>Tnfaip3</i> | -0.162046667 |
| <i>Mapk1</i>   | -0.155753333 |
| <i>Maff</i>    | -0.14415     |
| <i>Irf5</i>    | -0.13144     |
| <i>C3ar1</i>   | -0.130933333 |
| <i>Bcl2l1</i>  | -0.130643667 |
| <i>Atf2</i>    | -0.125656667 |
| <i>Tgfb1</i>   | -0.123026667 |
| <i>Il18</i>    | -0.12242     |
| <i>Tlr2</i>    | -0.122263333 |
| <i>Tyrobp</i>  | -0.113626667 |
| <i>C3</i>      | -0.110666667 |
| <i>Gnas</i>    | -0.089353333 |
| <i>Gnaq</i>    | -0.082727667 |
| <i>Il10rb</i>  | -0.075986667 |
| <i>Irf1</i>    | -0.075463333 |
| <i>Cfl1</i>    | -0.07277     |
| <i>Cdc42</i>   | -0.06998     |
| <i>Ly96</i>    | -0.05652     |

|              |              |
|--------------|--------------|
| <i>Oas1a</i> | -0.053942667 |
| <i>Rela</i>  | -0.05245     |
| <i>Gnbl</i>  | -0.04362     |

**Table S8.** Log2 fold changes among differentially expressed genes in the *M. vaccae* NCTC 11659/250 ng/mL LPS versus *M. vaccae* NCTC 11659/CMV condition.

| Gene symbol   | Log2 Fold Change |
|---------------|------------------|
| Upregulated   |                  |
| <i>Cfb</i>    | 5.51481          |
| <i>Ccl5</i>   | 5.06203          |
| <i>Ifit1</i>  | 4.22224          |
| <i>Ifit3</i>  | 2.99882          |
| <i>Nos2</i>   | 2.76852          |
| <i>Il6</i>    | 2.70201          |
| <i>Il1b</i>   | 2.67336          |
| <i>Cd40</i>   | 2.48141          |
| <i>Tradd</i>  | 2.08391          |
| <i>Maff</i>   | 1.98282          |
| <i>Cxcr1</i>  | 1.79891          |
| <i>Ccl2</i>   | 1.77745          |
| <i>Irf7</i>   | 1.76926          |
| <i>Tnf</i>    | 1.72265          |
| <i>Ccl3</i>   | 1.6804           |
| <i>Rock2</i>  | 1.6351           |
| <i>Irf1</i>   | 1.58854          |
| <i>Oasl1</i>  | 1.57138          |
| <i>Ccl7</i>   | 1.43047          |
| <i>Cxcl2</i>  | 1.32839          |
| <i>Ccl4</i>   | 1.29491          |
| <i>Il1a</i>   | 1.07101          |
| <i>Ripk2</i>  | 1.00964          |
| <i>Map3k5</i> | 1.00414          |
| <i>C3</i>     | 0.989572         |
| <i>Mx1</i>    | 0.983916         |
| <i>Keap1</i>  | 0.899553         |
| <i>Il6ra</i>  | 0.876298         |
| <i>Map2k6</i> | 0.873408         |
| <i>Ifit2</i>  | 0.777177         |
| <i>Ifi44</i>  | 0.757504         |
| <i>Il1rn</i>  | 0.719116         |
| <i>Clra</i>   | 0.701586         |
| <i>Ddit3</i>  | 0.697734         |

|                |           |
|----------------|-----------|
| <i>Il15</i>    | 0.691392  |
| <i>Csf1</i>    | 0.680683  |
| <i>Stat1</i>   | 0.66944   |
| <i>Ptgs2</i>   | 0.668     |
| <i>Hdac4</i>   | 0.640543  |
| <i>Nlrp3</i>   | 0.614881  |
| <i>Csf3</i>    | 0.609804  |
| <i>Fos</i>     | 0.591201  |
| Downregulated  |           |
| <i>Limk1</i>   | -1.59298  |
| <i>Cysltr1</i> | -1.52017  |
| <i>Ptgs1</i>   | -1.4189   |
| <i>Myl2</i>    | -1.38455  |
| <i>Max</i>     | -1.33951  |
| <i>Trem2</i>   | -1.31826  |
| <i>Hmgn1</i>   | -1.31755  |
| <i>Smad7</i>   | -1.30721  |
| <i>C1qb</i>    | -1.25213  |
| <i>Arg1</i>    | -1.19992  |
| <i>Tlr8</i>    | -1.19457  |
| <i>Fxyd2</i>   | -1.14316  |
| <i>C1s1</i>    | -1.0975   |
| <i>Mef2d</i>   | -1.04409  |
| <i>Ptger4</i>  | -1.0306   |
| <i>Hmgb1</i>   | -0.968003 |
| <i>Ptk2</i>    | -0.947579 |
| <i>Ripk1</i>   | -0.848458 |
| <i>Map3k7</i>  | -0.846216 |
| <i>Cd86</i>    | -0.80308  |
| <i>Grb2</i>    | -0.801806 |
| <i>Raf1</i>    | -0.755615 |
| <i>Bcl6</i>    | -0.700543 |
| <i>Pdgfa</i>   | -0.685679 |
| <i>Cxcr4</i>   | -0.684825 |
| <i>Mafk</i>    | -0.642115 |
| <i>Mrc1</i>    | -0.640967 |
| <i>Atf2</i>    | -0.636656 |
| <i>H2-Eb1</i>  | -0.613079 |
| <i>Tlr2</i>    | -0.594341 |

**Table S9.** Genes that had *p*-values less than 0.05 in the *M. vaccae* NCTC 11659/250 ng/mL LPS versus *M. vaccae* NCTC 11659/CMV comparison.

| Gene Symbol     | Log2 Fold Change |
|-----------------|------------------|
| Upregulated     |                  |
| <i>Elk1</i>     | 0.553416667      |
| <i>Irf5</i>     | 0.516513333      |
| <i>Map2k1</i>   | 0.513035667      |
| <i>Il18</i>     | 0.511036667      |
| <i>Prkcb</i>    | 0.502143         |
| <i>Tlr3</i>     | 0.502013333      |
| <i>Ptgir</i>    | 0.4707           |
| <i>Rps6ka5</i>  | 0.458906667      |
| <i>Myc</i>      | 0.455173333      |
| <i>Prkca</i>    | 0.453177         |
| <i>Tnfaip3</i>  | 0.399733333      |
| <i>Cxcl10</i>   | 0.37518          |
| <i>Mx2</i>      | 0.359341467      |
| <i>Mapk8</i>    | 0.341558         |
| <i>Nox1</i>     | 0.323453333      |
| <i>Ifi27l2a</i> | 0.27288          |
| <i>Nfatc3</i>   | 0.271963667      |
| <i>Oas1a</i>    | 0.267537         |
| <i>Cebpb</i>    | 0.267276667      |
| <i>Hif1a</i>    | 0.263643333      |
| <i>Hmgb2</i>    | 0.256328333      |
| <i>C4a</i>      | 0.248158333      |
| <i>Stat2</i>    | 0.228993333      |
| <i>Tlr4</i>     | 0.224303333      |
| <i>Nod1</i>     | 0.210726667      |
| <i>Mapkapk2</i> | 0.188243333      |
| <i>Traf2</i>    | 0.16002          |
| <i>Rela</i>     | 0.15726          |
| <i>Tlr6</i>     | 0.122373667      |
| <i>Clqa</i>     | 0.11133          |
| <i>Mapk3</i>    | 0.101563333      |
| <i>Tgfbr1</i>   | 0.088243333      |
| Downregulated   |                  |

|                 |              |
|-----------------|--------------|
| <i>Mef2c</i>    | -0.564018667 |
| <i>Cd4</i>      | -0.538076667 |
| <i>Cfl1</i>     | -0.52469     |
| <i>Il10rb</i>   | -0.521076667 |
| <i>Gnas</i>     | -0.498796667 |
| <i>Rhoa</i>     | -0.491613333 |
| <i>Tlr1</i>     | -0.475331667 |
| <i>Rac1</i>     | -0.450123333 |
| <i>Mknk1</i>    | -0.440986667 |
| <i>Mapk14</i>   | -0.438436667 |
| <i>Tyrobp</i>   | -0.435796667 |
| <i>Myd88</i>    | -0.420828333 |
| <i>Mmp9</i>     | -0.412677    |
| <i>Mapk1</i>    | -0.412053333 |
| <i>Map3k1</i>   | -0.392781    |
| <i>Flt1</i>     | -0.376388333 |
| <i>Jun</i>      | -0.3382      |
| <i>Gnaq</i>     | -0.333230667 |
| <i>Oas2</i>     | -0.331556667 |
| <i>Tollip</i>   | -0.292194667 |
| <i>Mafg</i>     | -0.269578333 |
| <i>Cdc42</i>    | -0.242263333 |
| <i>Birc2</i>    | -0.21882     |
| <i>Pla2g4a</i>  | -0.211443893 |
| <i>Nfkb1</i>    | -0.196643    |
| <i>Tlr9</i>     | -0.18426     |
| <i>Tlr7</i>     | -0.154416667 |
| <i>Tcf4</i>     | -0.15361     |
| <i>Gnb1</i>     | -0.14455     |
| <i>Shc1</i>     | -0.144303333 |
| <i>Nfe2l2</i>   | -0.127403333 |
| <i>Tgfb1</i>    | -0.12099     |
| <i>Gngt1</i>    | -0.113633333 |
| <i>C3ar1</i>    | -0.110406667 |
| <i>Ly96</i>     | -0.100955    |
| <i>Mapkapk5</i> | -0.10086     |



**Table S10.** Sample size for real-time reverse transcription polymerase chain reaction (RT-PCR).

| <b>LPS Treatment</b> | <b>Bacterial Treatment</b>            | <b>Sample Size (<i>n</i>)</b> |
|----------------------|---------------------------------------|-------------------------------|
| 0 ng/mL              | BBS                                   | 3                             |
|                      | 100 µg/mL <i>M. vaccae</i> NCTC 11659 | 2                             |
| 250 ng/mL            | BBS                                   | 2                             |
|                      | 100 µg/mL <i>M. vaccae</i> NCTC 11659 | 3                             |

**Table S11.** Total RNA concentrations in each sample prior to assessment using the NanoString nCounter system.

| <b>Sample Name</b>  | <b>RNA concentration (ng/µl)</b> |
|---------------------|----------------------------------|
| Sample 1 (BBS1/CMV) | 4.5                              |
| Sample 2 (BBS2/CMV) | 2.5                              |
| Sample 3 (BBS3/CMV) | 4.7                              |
| Sample 4 (Mv1/CMV)  | 4.4                              |
| Sample 5 (Mv2/CMV)  | 4.4                              |
| Sample 6 (Mv3/CMV)  | 4.1                              |
| Sample 7 (BBS/LPS1) | 5.1                              |
| Sample 8 (BBS/LPS2) | 5.1                              |
| Sample 9 (BBS/LPS3) | 4.8                              |
| Sample 10 (Mv/LPS1) | 4.9                              |
| Sample 11 (Mv/LPS2) | 5.6                              |
| Sample 12 (Mv/LPS3) | 4.9                              |

Abbreviations: BBS, borate-buffered saline; CMV, culture media vehicle; LPS, lipopolysaccharide; Mv, *Mycobacterium vaccae* NCTC 11659.
